# Supplementary material for: Effective measuring campaigns for reliable and informative full-scale WWTP data
Source: Royal Society of Chemistry journal article supplement (doi:10.1039/d4ew00315b), 2025-01-01
Supplement: d4ew00315b1.pdf [file d4ew00315b1.pdf]

*Supplementary information with:*

## **Effective measuring campaigns for reliable and informative full-scale WWTP data**

*Q.H. Le<sup>1,2</sup>, P. Carrera<sup>1,2</sup>, M.C.M. van Loosdrecht<sup>3</sup> and E.I.P. Volcke<sup>1,2\*</sup>*

1. Department of Green Chemistry and Technology, Ghent University, 9000 Ghent, Belgium

2 Centre for Advanced Process Technology for Urban REsource recovery (CAPTURE), Frieda Saeystraat 1, 9052 Gent, Belgium

3. Department of Biotechnology, Delft University of Technology, 2600 AA Delft, The Netherlands

\* corresponding author. Tel: +32 (0) 9 264 61 29; Email: [Eveline.Volcke@UGent.be](mailto:Eveline.Volcke@UGent.be)

## Appendix A. Previous studies with data-reconciliation-related content

This appendix presents an overview of published studies which applied data reconciliation to wastewater treatment plants.

**Table A1.** Data reconciliation and related topic applied to WWTPs

| #                                                      | Study                  | Data reconciliation-related content                                                                                                 | System                      | software         |
|--------------------------------------------------------|------------------------|-------------------------------------------------------------------------------------------------------------------------------------|-----------------------------|------------------|
| <b>Direct application to process data of WWTP</b>      |                        |                                                                                                                                     |                             |                  |
| 1                                                      | (Strous et al., 1998)  | Calculating stoichiometry of conversions of carbon and nitrogen compounds by Anammox                                                | Lab-scale reactor           | Macrobal         |
| 2                                                      | (Nowak et al., 1999)   | Validating operational data for modelling purposes                                                                                  | Pilot WWTP                  |                  |
| 3                                                      | (Meijer et al., 2002)  | Validating and reconciliation data for modelling purposes                                                                           | Full-scale municipal WWTP   | Macrobal         |
| 4                                                      | (Puig et al., 2008)    | Operational condition calculation (e.g. solid retention time, oxygen requirement) and benchmarking using reconciled data            | Full-scale municipal WWTP   | Macrobal         |
| 5                                                      | (Lim et al., 2012)     | Estimate N <sub>2</sub> O emission from the membrane reactor using reconciled flow data                                             | Pilot municipal WWTP        |                  |
| 6                                                      | (Villez et al., 2013a) | Bilinear data reconciliation applied to flow and total suspended solid measurements to detect sensor fault                          | Simulated data from BSM1_LT | Matlab           |
| 7                                                      | (Lotti et al., 2014)   | Calculating stoichiometry of conversions of carbon and nitrogen compounds by Anammox.                                               | Lab-scale reactor           | Macrobal         |
| 8                                                      | (Meijer et al., 2015)  | Reconciled data for modelling calibrating and validating                                                                            | Full-scale municipal WWTP   | Macrobal         |
| 9                                                      | (Lee et al., 2015)     | Demonstrate data reconciliation, raising the importance of reliable data                                                            | Simulated data from GPS-X   |                  |
| 10                                                     | (Behnami et al., 2016) | Evaluating the performance of a WWTP using reconciled data                                                                          | Full-scale industrial WWTP  | Matlab           |
| <b>Redundancy analysis and variable classification</b> |                        |                                                                                                                                     |                             |                  |
| 12                                                     | (Villez et al., 2013b) | Application of a graph-theoretical method for the classification of variables for a given sensor configuration                      | Simulated data from BSM1_LT | Matlab           |
| 13                                                     | (Spindler, 2014)       | Deriving redundancy mass balances for a given WWTP configuration given measured and unmeasured variables (flows and concentrations) | WWTP                        | Sage Mathematics |
| 14                                                     | (Villez et al., 2016)  | Method to obtain Pareto optimal flow sensor layouts in terms of cost, observability, and                                            | WWTP                        | Matlab           |

| #                              | Study                    | Data reconciliation-related content                                                                                        | System                     | software |
|--------------------------------|--------------------------|----------------------------------------------------------------------------------------------------------------------------|----------------------------|----------|
|                                |                          | redundancy that enable fault detection for a given WWTP configuration                                                      |                            |          |
| <b>Substance flow analysis</b> |                          |                                                                                                                            |                            |          |
| 16                             | (Sokka et al., 2004)     | Balanced data for examining the flows of nitrogen and phosphorus in the municipal waste                                    | Municipality               | STAN     |
| 17                             | (Benedetti et al., 2006) | Balancing data for water, BOD, COD, total nitrogen, total phosphorus, Zn of the wastewater collection and treatment system | Sewer catchment            |          |
| 18                             | (Yoshida et al., 2015)   | Examining the fate of organic carbon, heavy metals and organic pollutants in a WWTP                                        | Full-scale municipal WWTP  | STAN     |
| 19                             | (Kim et al., 2017)       | Substance flow analysis of mercury from industrial and municipal wastewater treatment facilities                           | Full-scale industrial WWTP | STAN     |
| <b>Others</b>                  |                          |                                                                                                                            |                            |          |
| 20                             | (Rieger et al., 2010)    | Mass balance-based to validate historical data from a WWTP for modelling purposes                                          | WWTP                       |          |

## **Appendix B. Experimental design procedure for data reconciliation**

### **B1. Overview**

The experimental design procedure for practical application to wastewater treatment processes of Le et al. (2018) is summarized in Figure B1. The first three steps comprise the gathering of case-study-specific input information: the main goals and corresponding key variables are defined first (Step 1), followed by the set-up of an incidence matrix and mass balances based on the process flow diagram (Step 2), and by the inventory of available data (Step 3). The gathering of input information, which is most time-consuming, is followed by a fully automated procedure for finding optimal solutions. It is checked upfront that the combination of the given list of key variables and the given set of mass balances are relevant in the sense that key variables are identifiable (Step 4). Mass balances and their corresponding variables are clustered in groups of overlapping mass balances (Step 5), which greatly improves the efficiency of finding all solutions, i.e. sets of additionally measured variables that satisfy the defined main goal (Step 6). Steps 4-6 rely on a comprehensive redundancy analysis, following the method of van der Heijden et al. (1994). Among all solutions, a selection is made of optimal ones in terms of additional measurement costs and accuracy of identified key variables (Step 7). Step 4 to Step 7 were implemented in MATLAB 2014b (MathWorks®). More details on the individual steps are provided in Le et al. (2018).

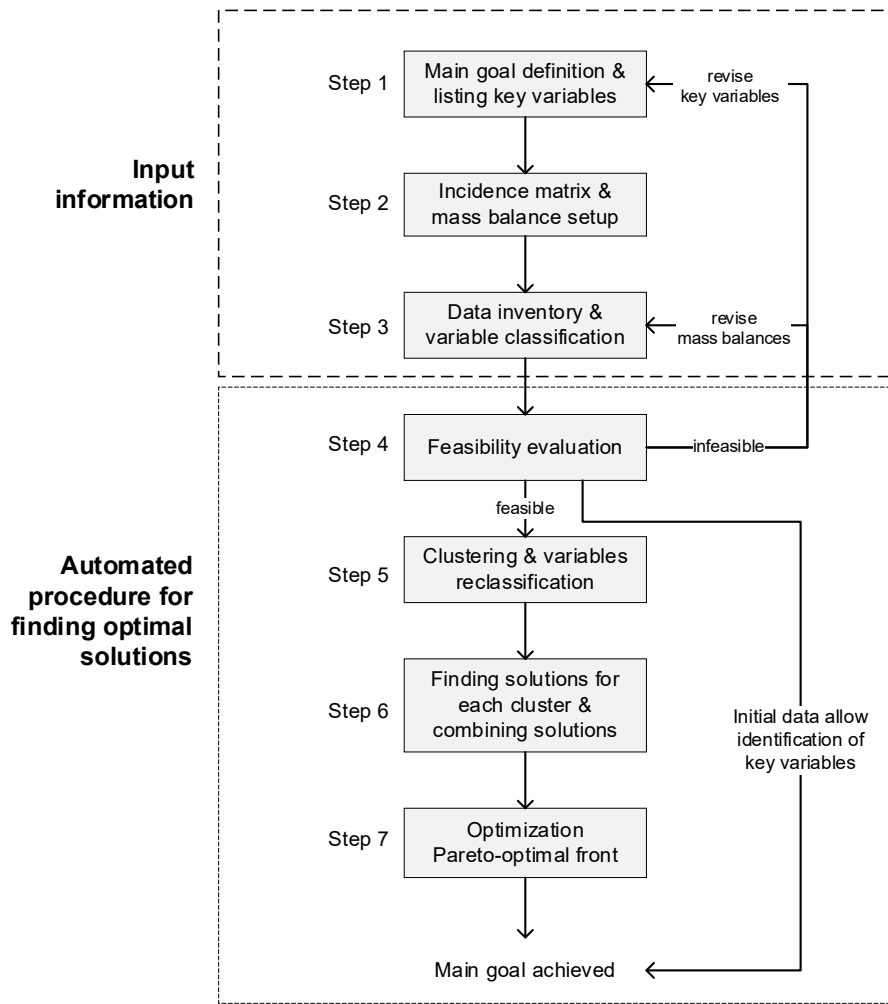

**Figure B1.** Experimental design procedure for the selection of sets of additionally measured variables that allow the identification of key variables (Le et al., 2018).

## B2. Pareto-optimal solutions balancing cost and accuracy

The additional measurement costs and the accuracy of identified key variables were quantified through a cost function  $f_C$  and an accuracy function  $f_V$ , respectively, which are calculated according to Le et. al. (2018):

$$f_C = \sum_{j=1}^{n_p} w_{aj} \cdot a_j \quad (\text{Eq. B1})$$

$$f_V = \frac{1}{n_{k_i=1}} \sum_{i=1}^{n_k} v_i / v_i^r \quad (\text{Eq. B2})$$

in which

- $n_p$  is the number of potential additional measurements
- $a_j$  is a binary number indicating whether a potential additional measured variable with index  $j$  ( $=1, \dots, n_p$ ) is measured (1) or not measured (0) (see Tables C2b, C3b, C4b and C5b for application to the case studies).
- $w_{aj}$  is the cost of additional measurement  $j$  (given in Table C1, C2a, C3a, C4a and C5a for the case studies).
- $n_k$  is the number of key variables.
- $v_i$  is the variance of new estimates (after data reconciliation) of key variables of a solution
- $v_i^r$  is the variance of new estimates of key variable when the reference solution is implemented, i.e. when all additional measurements are performed.
- $v_i$  and  $v_i^r$  were calculated from measurement uncertainty  $\sigma$  of the reported measured data (Table C1, C2a, C3a, C4a and C5a for the case studies) according to the procedures specified in the Supplementary Information of Le et al. (2018).

## Appendix C. Measured data sets and Pareto-optimal solutions for the case studies considered

### C1. Case study 1: Meijer et al. (2002), average data of one year

**Table C1.** Measured data set used for data reconciliation by (Meijer et al., 2002) - case study 1

| variable →<br>↓ stream |                    | Q<br>[m <sup>3</sup> .day <sup>-1</sup> ] |                |       | TP<br>[g P·m <sup>-3</sup> ] |                |     | COD<br>[g COD·m <sup>-3</sup> ] |                |      | TKN<br>[g N·m <sup>-3</sup> ] |                |      | NOx<br>[g N·m <sup>-3</sup> ] |                |   |
|------------------------|--------------------|-------------------------------------------|----------------|-------|------------------------------|----------------|-----|---------------------------------|----------------|------|-------------------------------|----------------|------|-------------------------------|----------------|---|
|                        |                    | m                                         | w <sub>a</sub> | σ     | m                            | w <sub>a</sub> | σ   | m                               | w <sub>a</sub> | σ    | m                             | w <sub>a</sub> | σ    | m                             | w <sub>a</sub> | σ |
| in                     | influent           | 1*                                        | 10             | 2,000 | 1*                           | 10             | 100 | 1*                              | 10             | 2000 | 1*                            | 10             | 1000 | 1*                            | 10             | 2 |
| ef                     | effluent           |                                           | 10             | 2,000 | 1*                           | 10             | 10  | 1*                              | 10             | 2000 | 1*                            | 10             | 1000 | 1*                            | 10             | 2 |
| ce                     | inflow centrifuge  | 1*                                        | 10             | 100   | 1*                           | 10             | 100 | 1*                              | 10             | 100  | 1*                            | 10             | 50   | 1*                            | 10             | 2 |
| cent                   | outflow centrifuge |                                           | 10             | 100   | 1*                           | 10             | 100 | 1*                              | 10             | 100  | 1*                            | 10             | 50   |                               | 10             | 2 |
| ex                     | excess sludge      | 1*                                        | 10             | 100   | 1*                           | 10             | 100 |                                 | 10             | 100  |                               | 10             | 50   | 1*                            | 10             | 2 |

**Note**

Q = flow rate, TP = total phosphorus, COD = chemical oxygen demand, TKN = Kjeldahl nitrogen, NOx = nitrate.

m = measurement availability: 1 = measured, empty = unmeasured.

\* variable included in initial data set provided by (Meijer et al., 2002)

w<sub>a</sub> = cost of measurements (assumed to be the same for all measurements)

σ = magnitude of measurement uncertainty (derived from reported measured data)

## C2. Case study 2: Meijer et al. (2002), data from measurement campaign of 8 days

**Table C2a.** Measured data set used for data reconciliation by Meijer et al. (2002) - case study 2

|      | Short Name                  | Q<br>[m <sup>3</sup> ·day <sup>-1</sup> ] |                |       | TP<br>[g P·m <sup>-3</sup> ] |                |    | TKN<br>[g N·m <sup>-3</sup> ] |                |     |
|------|-----------------------------|-------------------------------------------|----------------|-------|------------------------------|----------------|----|-------------------------------|----------------|-----|
|      |                             | m                                         | w <sub>a</sub> | σ     | m                            | w <sub>a</sub> | σ  | m                             | w <sub>a</sub> | σ   |
|      |                             | in                                        | influent       | 1*    | 10                           | 1,000          | 1* | 10                            | 50             | 1*  |
| r1   | R1 to R2                    |                                           | 10             | 1,000 | 1                            | 10             | 50 | 1                             | 10             | 500 |
| rc   | recycle R3 to R2            | 1                                         | 10             | 1,000 | 1                            | 10             | 50 | 1                             | 10             | 500 |
| r2   | R2 to R3                    |                                           | 10             | 1,000 | 1                            | 10             | 50 |                               | 10             | 500 |
| r3   | R3 to clarifier             |                                           | 10             | 1,000 |                              | 10             | 50 |                               | 10             | 500 |
| rt12 | clarifier CL12 to R2 and TH | 1                                         | 10             | 1,000 | 1                            | 10             | 50 | 1                             | 10             | 500 |
| ef   | effluent                    |                                           | 10             | 1,000 | 1                            | 10             | 50 |                               | 10             | 500 |
| rt34 | clarifier CL34 to R1 and R2 | 1                                         | 10             | 1,000 | 1                            | 10             | 10 | 1                             | 10             | 10  |
| th   | inflow thickening           | 1                                         | 10             | 100   | 1                            | 10             | 50 |                               | 10             | 50  |
| over | overflow thickening TH      |                                           | 10             | 100   |                              | 10             | 50 | 1                             | 10             | 50  |
| ce   | input centrifuge            | 1*                                        | 10             | 100   | 1*                           | 10             | 50 |                               | 10             | 50  |
| cent | output centrifuge           |                                           | 10             | 100   | 1*                           | 10             | 50 | 1*                            | 10             | 50  |
| ex   | excess sludge               | 1*                                        | 10             | 100   |                              | 10             | 50 |                               | 10             | 50  |

Note:

Q = flow rate, TP = total phosphorus concentration, TKN = Kjeldahl nitrogen concentration

m = measurement availability, 1 = measured, empty = unmeasured

\* variable included in initial data set provided by (Meijer et al., 2002)

w<sub>a</sub> = cost of measurements (assumed to be the same for every measurement)

σ = magnitude of measurement uncertainty (derived from reported measured data)

**Table C2b.** Pareto-optimal solutions from experimental design procedure applied to the setup of Meijer et al. (2002). For all potential additional measurements, it is indicated whether (1) or not (empty) they should be included in the measurement campaign.

| # | a  | fc  | fv   | Q <sub>r1</sub> | Q <sub>r2</sub> | Q <sub>r3</sub> | Q <sub>rc</sub> | Q <sub>rt12</sub> | Q <sub>rt34</sub> | Q <sub>ef</sub> | Q <sub>th</sub> | Q <sub>ce</sub> | Q <sub>over</sub> | Q <sub>cent</sub> | Q <sub>ex</sub> |
|---|----|-----|------|-----------------|-----------------|-----------------|-----------------|-------------------|-------------------|-----------------|-----------------|-----------------|-------------------|-------------------|-----------------|
| 1 | 7  | 70  | 1.96 |                 | 1               |                 | 1               | 1                 | 1                 |                 | 1               | 1               |                   | 1                 |                 |
| 2 | 8  | 80  | 1.55 |                 | 1               |                 | 1               | 1                 | 1                 |                 | 1               | 1               | 1                 |                   | 1               |
| 3 | 9  | 90  | 1.39 |                 | 1               |                 | 1               | 1                 | 1                 | 1               | 1               | 1               | 1                 |                   | 1               |
| 4 | 10 | 100 | 1.24 |                 | 1               |                 | 1               | 1                 | 1                 | 1               | 1               | 1               | 1                 | 1                 | 1               |
| 5 | 11 | 110 | 1.13 | 1               | 1               |                 | 1               | 1                 | 1                 | 1               | 1               | 1               | 1                 | 1                 | 1               |
| 6 | 12 | 120 | 1.05 | 1               | 1               | 1               | 1               | 1                 | 1                 | 1               | 1               | 1               | 1                 | 1                 | 1               |

# = solution number, a = additional measurements, fc = cost of additional measurements (the lower the better), fv = accuracy of the solution (the smaller the more accurate)







## C5. Case study 5: Behnami et al. (2016)

**Table C5a.** Measured data set used for data reconciliation by Behnami et al. (2016).

| PFD | Short Name                  | Q [m <sup>3</sup> .day <sup>-1</sup> ] |                |       |
|-----|-----------------------------|----------------------------------------|----------------|-------|
|     |                             | m                                      | w <sub>a</sub> | σ     |
| in1 | Influent process wastewater | 1*                                     | 10             | 500   |
| in2 | Sanitary wastewater         | 1*                                     | 10             | 100   |
| 1   | Screened influent           | 1                                      | 10             | 500   |
| 2   | API                         | 1                                      | 10             | 500   |
| 3   | Equalization                | 1                                      | 10             | 500   |
| 4   | DAF                         | 1                                      | 10             | 500   |
| 5   | Aeration                    | 1                                      | 10             | 1,000 |
| 6   | Clarifier 1                 | 1                                      | 10             | 500   |
| 7   | Clarifier 2                 | 1                                      | 10             | 500   |
| 8   | Treated effluent            | 1                                      | 10             | 500   |
| 9   | Oily sludge from API        | 1                                      | 10             | 2     |
| 10  | Sand & grit from API        | 1                                      | 10             | 2     |
| 11  | Return effluent from DAF    | 1                                      | 10             | 2     |
| 12  | Oily sludge from DAF        | 1                                      | 10             | 2     |
| 13  | Returned activated sludge   | 1                                      | 10             | 500   |
| 14  | Waste sludge clarifier 1    | 1                                      | 10             | 2     |
| 15  | Waste sludge clarifier 2    | 1                                      | 10             | 2     |
| 16  | Backwash water              | 1                                      | 10             | 2     |
| 17  | Backwash eff                | 1                                      | 10             | 2     |

Q = flow rate

m = measurement availability: 1 = measured, empty = unmeasured

\* variable included in initial data set (assuming that influents were measured)

w<sub>a</sub> = cost of measurements (assumed to be the same for every measurement)

σ = magnitude of measurement uncertainty (derived from reported measured data)

**Table C5b.** Pareto-optimal solutions provided by the experimental design procedure to balance all key variables.

| #  | a  | fc  | fv   | Q <sub>1</sub> | Q <sub>2</sub> | Q <sub>3</sub> | Q <sub>4</sub> | Q <sub>5</sub> | Q <sub>6</sub> | Q <sub>7</sub> | Q <sub>8</sub> | Q <sub>9</sub> | Q <sub>10</sub> | Q <sub>11</sub> | Q <sub>12</sub> | Q <sub>13</sub> | Q <sub>14</sub> | Q <sub>15</sub> | Q <sub>16</sub> | Q <sub>17</sub> |
|----|----|-----|------|----------------|----------------|----------------|----------------|----------------|----------------|----------------|----------------|----------------|-----------------|-----------------|-----------------|-----------------|-----------------|-----------------|-----------------|-----------------|
| 1  | 7  | 70  | 1.72 |                |                |                |                |                |                | 1              | 1              | 1              |                 |                 | 1               |                 | 1               | 1               | 1               |                 |
| 2  | 8  | 80  | 1.41 |                |                |                | 1              |                |                |                | 1              | 1              | 1               |                 | 1               |                 | 1               | 1               | 1               |                 |
| 3  | 9  | 90  | 1.41 |                |                |                | 1              |                | 1              |                | 1              | 1              | 1               |                 | 1               |                 | 1               | 1               | 1               |                 |
| 4  | 10 | 100 | 1.25 | 1              |                |                | 1              |                |                |                | 1              | 1              | 1               | 1               | 1               |                 | 1               | 1               | 1               |                 |
| 5  | 11 | 110 | 1.15 | 1              |                | 1              | 1              |                |                |                | 1              | 1              | 1               | 1               | 1               |                 | 1               | 1               | 1               |                 |
| 6  | 12 | 120 | 1.09 | 1              | 1              | 1              | 1              |                |                |                | 1              | 1              | 1               | 1               | 1               |                 | 1               | 1               | 1               |                 |
| 7  | 13 | 130 | 1.09 | 1              | 1              |                | 1              |                |                | 1              | 1              | 1              | 1               | 1               | 1               |                 | 1               | 1               | 1               | 1               |
| 8  | 14 | 140 | 1.04 | 1              | 1              |                | 1              |                | 1              | 1              | 1              | 1              | 1               | 1               | 1               |                 | 1               | 1               | 1               | 1               |
| 9  | 15 | 150 | 1.01 | 1              | 1              | 1              | 1              |                | 1              | 1              | 1              | 1              | 1               | 1               | 1               |                 | 1               | 1               | 1               | 1               |
| 10 | 17 | 170 | 1    | 1              | 1              | 1              | 1              | 1              | 1              | 1              | 1              | 1              | 1               | 1               | 1               | 1               | 1               | 1               | 1               | 1               |

# = solution number, a = additional measurements, fc = cost of additional measurements (the lower the better), fv = accuracy of the solution (the smaller the more accurate)

## References

- Behnami, A., Shakerkhatibi, M., Dehghanzadeh, R., Benis, K.Z., Derafshi, S., Fatehifar, E., 2016. The implementation of data reconciliation for evaluating a full-scale petrochemical wastewater treatment plant. *Environmental Science and Pollution Research* 23, 22586–22595. <https://doi.org/10.1007/s11356-016-7484-5>
- Benedetti, L., Dirckx, G., Bixio, D., Thoeye, C., Vanrolleghem, P.A., 2006. Substance flow analysis of the wastewater collection and treatment system. *Urban Water Journal* 3, 33–42. <https://doi.org/10.1080/15730620600578694>
- Kim, H., Jang, Y.C., Hong, Y.S., 2017. Substance flow analysis of mercury from industrial and municipal wastewater treatment facilities. *International Journal of Applied Engineering Research* 12, 5332–5338.
- Le, Q.H., Verheijen, P.J.T., van Loosdrecht, M.C.M., Volcke, E.I.P., 2018. Experimental design for evaluating WWTP data by linear mass balances. *Water Research* 142, 415–425. <https://doi.org/https://doi.org/10.1016/j.watres.2018.05.026>
- Lee, S., Rao, S., Kim, M.J., Esfahani, I.J., Yoo, C.K., 2015. Assessment of environmental data quality and its effect on modelling error of full-scale plants with a closed-loop mass balancing. *Environmental Technology (United Kingdom)* 36, 3253–3261. <https://doi.org/10.1080/09593330.2015.1058859>
- Lim, J.J., Sankarrao, B., Oh, T.S., Kim, M.J., Kang, O.Y., Kim, J.T., Yoo, C.K., 2012. Estimation of nitrous oxide emissions (GHG) from wastewater treatment plants using closed-loop mass balance and data reconciliation. *Korean Journal of Chemical Engineering* 29, 1123–1128. <https://doi.org/10.1007/s11814-011-0283-2>
- Lotti, T., Kleerebezem, R., Lubello, C., van Loosdrecht, M.C.M., 2014. Physiological and kinetic characterization of a suspended cell anammox culture. *Water Research* 60, 1–14. <https://doi.org/10.1016/j.watres.2014.04.017>

- Meijer, S. C.F., Van Der Spoel, H., Susanti, S., Heijnen, J.J., Van Loosdrecht, M.C.M., 2002. Error diagnostics and data reconciliation for activated sludge modelling using mass balances. *Water Science and Technology* 45, 145–156.
- Meijer, Sebastiaan C F, Van Der Spoel, H., Susanti, S., Heijnen, J.J., Van Loosdrecht, M.C.M., 2002. Error diagnostics and data reconciliation for activated sludge modelling using mass balances. *Water Science and Technology* 45, 145–156.
- Meijer, S.C.F., van Kempen, R.N.A., Appeldoorn, K.J., 2015. Plant upgrade using big-data and reconciliation techniques, in: Brdjanovic, D., Meijer, S.C.F., Lopez-Vazquez, C.M., Hooijmans, C.M., Loosdrecht, M.C.M. van (Eds.), *Applications of Activated Sludge Models*. IWA publishing, pp. 357–410.
- Nowak, O., Franz, A., Svardal, K., Muller, V., Kuhn, V., 1999. Parameter estimation for activated sludge models with the help of mass balances. *Water Science and Technology* 39, 113–120. [https://doi.org/Doi 10.1016/S0273-1223\(99\)00065-7](https://doi.org/Doi 10.1016/S0273-1223(99)00065-7)
- Puig, S., van Loosdrecht, M.C.M., Colprim, J., Meijer, S.C.F., 2008. Data evaluation of full-scale wastewater treatment plants by mass balance. *Water Research* 42, 4645–4655. <https://doi.org/DOI 10.1016/j.watres.2008.08.009>
- Rieger, L., Takacs, I., Villez, K., Siegrist, H., Lessard, P., Vanrolleghem, P.A., Comeau, Y., 2010. Data reconciliation for wastewater treatment plant simulation studies-planning for high-quality data and typical sources of errors. *Water Environment Research* 82, 426–433. <https://doi.org/Doi 10.2175/106143009x12529484815511>
- Sokka, L., Antikainen, R., Kauppi, P., 2004. Flows of nitrogen and phosphorus in municipal waste : a substance flow analysis in Finland. *Progress in Industrial Ecology* 1, 165–186. <https://doi.org/10.1504/PIE.2004.004677>
- Spindler, A., 2014. Structural redundancy of data from wastewater treatment systems. Determination of individual balance equations. *Water Research* 57, 193–201. <https://doi.org/10.1016/j.watres.2014.03.042>

- Strous, M., Heijnen, J.J., Kuenen, J.G., Jetten, M.S.M., 1998. The sequencing batch reactor as a powerful tool for the study of slowly growing anaerobic ammonium-oxidizing microorganisms. *Applied Microbiology and Biotechnology* 50, 589–596.
- van der Heijden, R.T.J.M., Romein, B., Heijnen, J.J., Hellinga, C., Luyben, K.C.A.M., 1994. Linear constrain relations in biochemical reaction systems III. Sequential application of data reconciliation for sensitive detection of systematic errors. *Biotechnol Bioeng* 44, 781–791. <https://doi.org/10.1002/bit.260440703>
- Villez, K., Vanrolleghem, P., Corominas, L., 2013a. Sensor fault detection and diagnosis based on bilinear mass balances in wastewater treatment systems, in: 11th IWA Conference on Instrumentation Control and Automation. Narbonne, France.
- Villez, K., Vanrolleghem, P., Corominas, L., 2013b. Structural observability and redundancy classification for sensor networks in wastewater systems, in: 11th IWA Conference on Instrumentation Control and Automation. Narbonne, France.
- Villez, K., Vanrolleghem, P.A., Corominas, L., 2016. Optimal flow sensor placement on wastewater treatment plants. *Water Research* 101, 75–83. <https://doi.org/10.1016/j.watres.2016.05.068>
- Yoshida, H., Christensen, T.H., Guildal, T., Scheutz, C., 2015. A comprehensive substance flow analysis of a municipal wastewater and sludge treatment plant. *Chemosphere* 138, 874–882. <https://doi.org/10.1016/j.chemosphere.2013.09.045>
